# Supplementary material for: A simple continuous reaction for the synthesis of quinoline compounds
Source: Royal Society of Chemistry journal article supplement (doi:10.1039/d1gc03064g), 2022-01-01
Supplement: d1gc03064g1.pdf [file d1gc03064g1.pdf]

## Supporting Information

### A simple continuous reaction for synthesis of quinoline compounds

Suhong Song<sup>a</sup>, Yuyu Dai<sup>a</sup>, Yunyang Hong<sup>a</sup>, Xiaoqing Li<sup>a</sup>, Xinhuan Yan<sup>\*a</sup>

<sup>a</sup>State Key Laboratory Breeding Base of Green Chemistry-Synthesis Technology, Zhejiang University of Technology, Hangzhou 310014, China.

### Table of Contents

|                                                         |    |
|---------------------------------------------------------|----|
| 1. EDS spectra of catalyst.....                         | 1  |
| 2. Related experimental data .....                      | 2  |
| 3. Analytical Data for Products .....                   | 3  |
| 4. <sup>1</sup> H and <sup>13</sup> C NMR Spectra ..... | 6  |
| 5. Mass Spectra .....                                   | 15 |

# 1. EDS spectra of catalyst

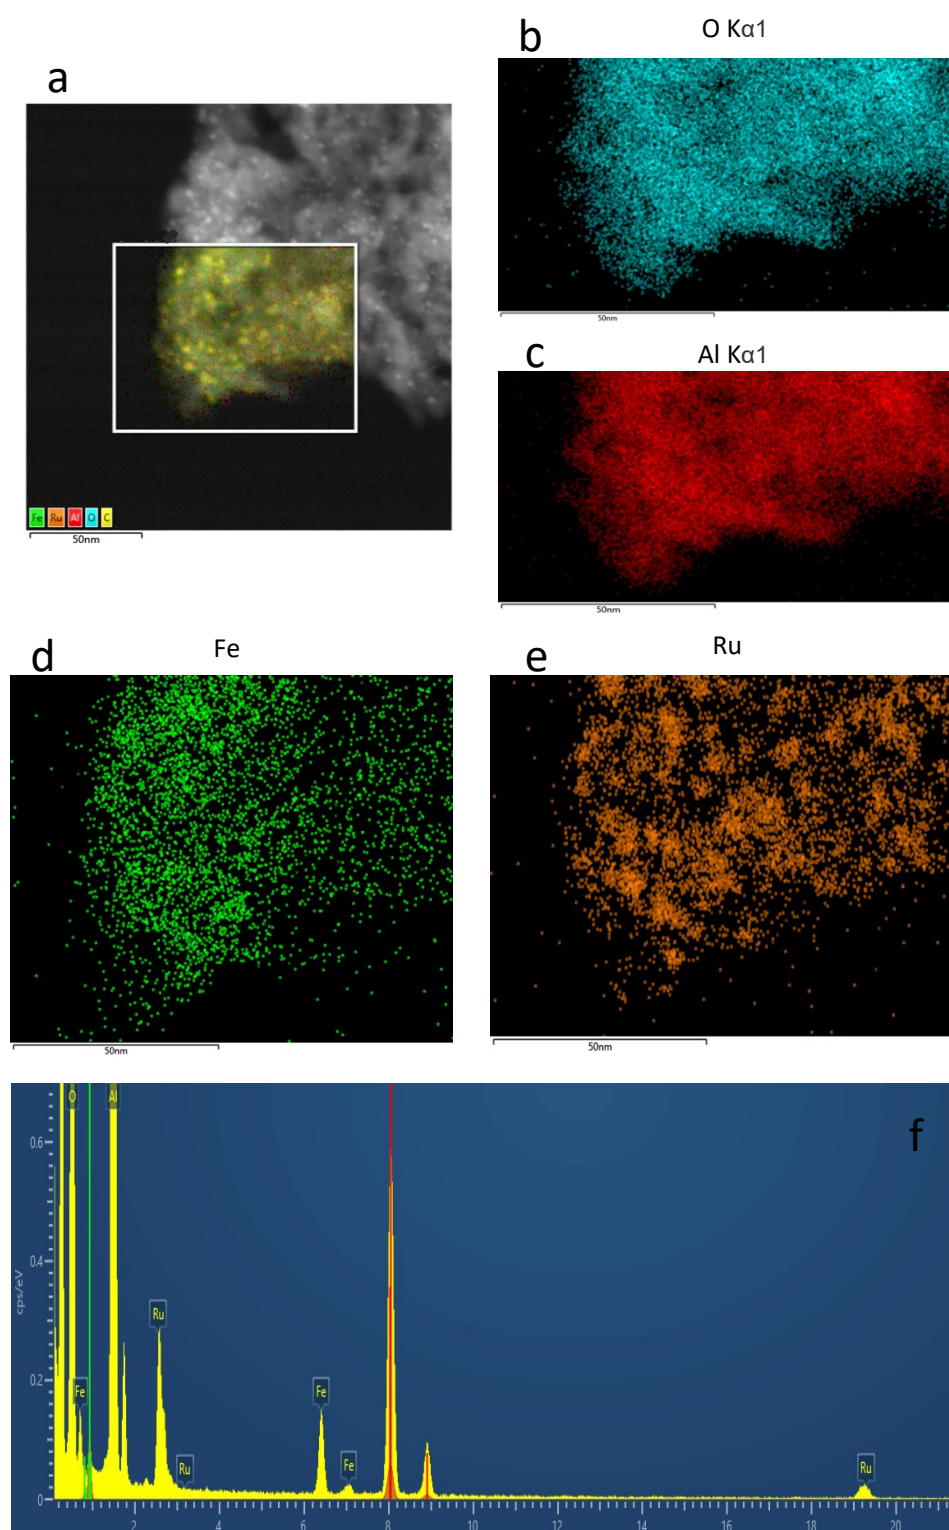

**Fig. S1** EDS spectra of the Ru-Fe/ $\gamma$ -Al<sub>2</sub>O<sub>3</sub> catalyst

## 2. Related experimental data

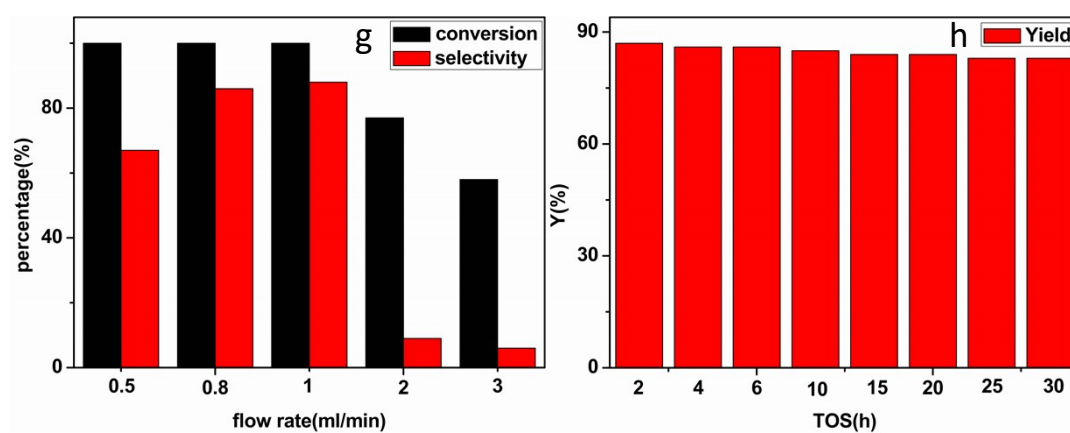

**Fig. S2** Catalytic properties of flow rate (g) and stability of catalysts (h). Common reaction conditions: 2wt% m-dinitrobenzene, 3 MPa, 5 g catalysts, 180 °C.

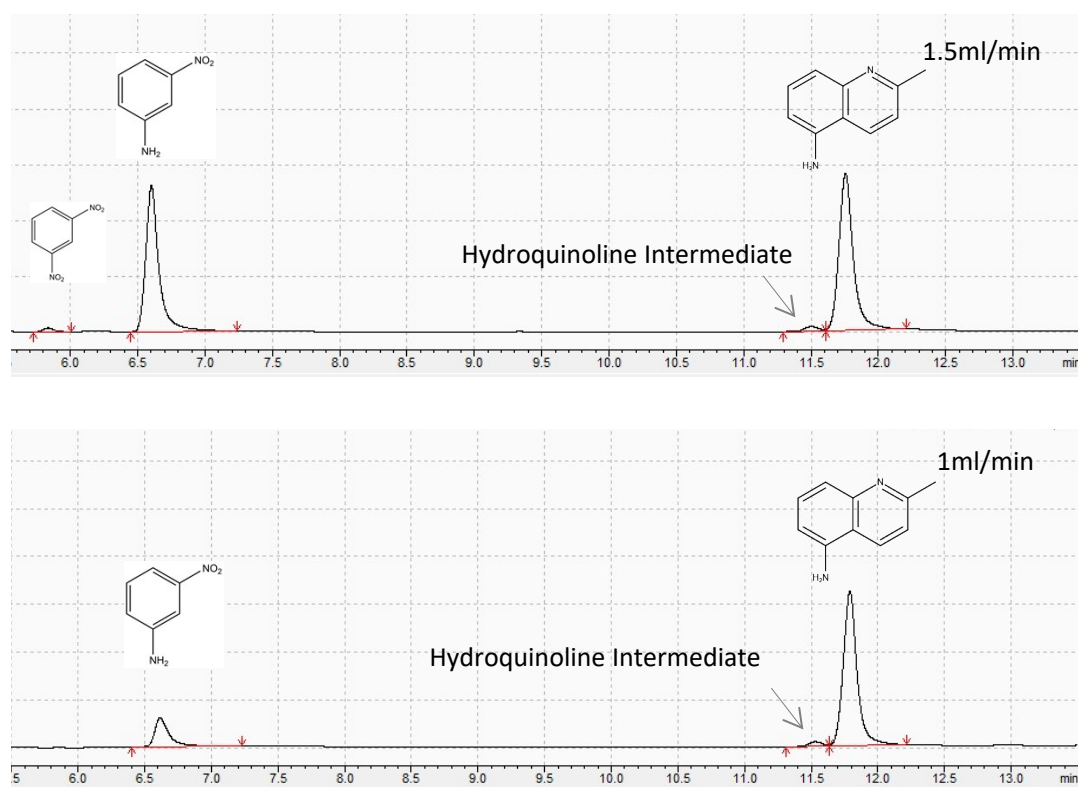

**Fig. S3** GC spectrum at two different flow rates. (GC conditions: Detector temperature: 250°C, vaporization chamber temperature: 230°C, column temperature: 150°C, 2°C/min to 160°C, keep for one minute and then 5°C/min to 200°C, Keep for one minute.). Common reaction conditions: 2wt% m-dinitrobenzene, 3 MPa, 5 g catalysts, 180 °C.

**Table. S1** Some reactions on the mechanism

| Raw material          | Conversion/% | Selectivity <sup>a</sup> /% |
|-----------------------|--------------|-----------------------------|
| m-Nitroaniline        | 96           | 70                          |
| Aniline               | 20           | -                           |
| Aniline and 2-butenal | 50           | 20                          |

Reaction conditions: c (substrate) = 2wt%, 3 MPa, 1 ml/min, 5 g catalysts, ethanol-water ratios: 4:6 (V: V). <sup>a</sup>Corresponding to the selectivity of quinoline compounds, the main by-products are N-alkylations.

### 3. Analytical Data for Products

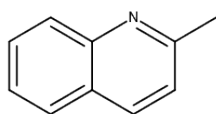

2-Methylquinoline<sup>1</sup>, <sup>1</sup>H NMR (500 MHz, Chloroform-d):  $\delta$ =7.93 (d, J = 8.4 Hz, 1H), 7.76 (d, J = 8.4 Hz, 1H), 7.56–7.47 (m, 2H), 7.27 (ddd, J = 8.1, 6.8, 1.2 Hz, 1H), 7.01 (d, J = 8.4 Hz, 1H), 2.57 (s, 3H). <sup>13</sup>C NMR (126 MHz, CDCl<sub>3</sub>):  $\delta$ =158.13, 147.42, 135.29, 128.72, 128.20, 126.96, 125.91, 124.99, 121.25, 24.75.

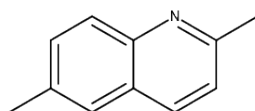

2,6-Dimethylquinoline<sup>2</sup>, <sup>1</sup>H NMR (500 MHz, Chloroform-d):  $\delta$ =7.93 (t, J = 8.0 Hz, 2H), 7.50 (dd, J = 9.2, 1.4 Hz, 2H), 7.23 (d, J = 8.4 Hz, 1H), 2.72 (s, 3H), 2.51 (s, 3H). <sup>13</sup>C NMR (126 MHz, CDCl<sub>3</sub>):  $\delta$ =157.94, 146.40, 135.52, 135.34, 131.61, 128.26, 126.47, 126.35, 121.92, 25.19, 21.43.

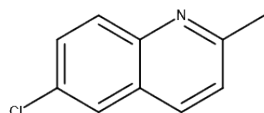

6-Chloro-2-methylquinoline<sup>3</sup>, <sup>1</sup>H NMR (500 MHz, Chloroform-d):  $\delta$ =7.93 (dd, J = 8.6, 3.7 Hz, 2H), 7.73 (d, J = 2.3 Hz, 1H), 7.60 (dd, J = 9.0, 2.4 Hz, 1H), 7.29 (s, 1H), 2.73 (s, 3H). <sup>13</sup>C NMR (126 MHz, CDCl<sub>3</sub>):  $\delta$ =159.32, 146.24, 135.13, 131.25, 130.27, 130.21, 127.03, 126.12, 122.81, 25.32.

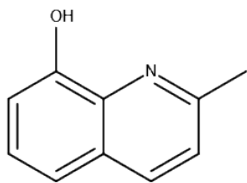

2-Methyl-8-quinolinol<sup>3</sup>, <sup>1</sup>H NMR (500 MHz, DMSO-d<sub>6</sub>): δ=9.44 (s, 1H), 8.16 (d, J = 8.4 Hz, 1H), 7.45–7.27 (m, 3H), 7.08 (dd, J = 7.2, 1.7 Hz, 1H), 2.67 (s, 3H). <sup>13</sup>C NMR (126 MHz, DMSO): δ=157.10, 152.95, 138.26, 136.55, 127.38, 126.82, 123.02, 118.00, 111.49, 25.14.

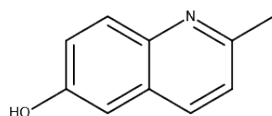

6-Hydroxy-2-methylquinoline, <sup>1</sup>H NMR (500 MHz, DMSO-d<sub>6</sub>): δ=9.83 (s, 1H), 8.02 (d, J = 8.4 Hz, 1H), 7.76 (d, J = 9.0 Hz, 1H), 7.30–7.23 (m, 2H), 7.10 (d, J = 2.7 Hz, 1H), 2.58 (s, 3H). <sup>13</sup>C NMR (126 MHz, DMSO): δ=156.40, 154.54, 142.04, 135.83, 129.07, 127.85, 123.06, 122.11, 109.00, 24.13.

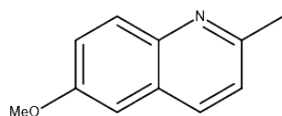

6-Methoxy-2-methylquinoline<sup>2</sup>, <sup>1</sup>H NMR (500 MHz, Chloroform-d): δ=7.94 (dd, J = 11.6, 8.8 Hz, 2H), 7.35 (dd, J = 9.2, 2.8 Hz, 1H), 7.25 (d, J = 8.4 Hz, 1H), 7.05 (d, J = 2.8 Hz, 1H), 3.93 (s, 3H), 2.72 (s, 3H). <sup>13</sup>C NMR (126 MHz, CDCl<sub>3</sub>): δ=157.15, 156.33, 143.88, 135.02, 130.00, 127.30, 122.21, 121.84, 105.24, 55.48, 25.00.

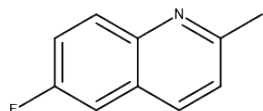

6-Fluoro-2-methylquinoline<sup>2</sup>, <sup>1</sup>H NMR (500 MHz, Chloroform-d): δ=7.99 (dd, J = 9.2, 5.3 Hz, 1H), 7.95 (d, J = 8.4 Hz, 1H), 7.46–7.39 (m, 1H), 7.35 (dd, J = 8.8, 2.9 Hz, 1H), 7.26 (d, J = 8.4 Hz, 1H), 2.71 (s, 3H). <sup>13</sup>C NMR (126 MHz, CDCl<sub>3</sub>): δ=160.89, 158.22, 144.89, 135.41, 130.93, 126.88, 122.69, 119.28, 110.54, 25.15.

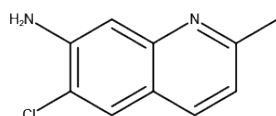

$^1\text{H}$  NMR (600 MHz, Chloroform-d):  $\delta$ =7.82 (d, J = 8.3 Hz, 1H), 7.71 (s, 1H), 7.28 (s, 1H), 7.06 (d, J = 8.3 Hz, 1H), 4.44 (s, 2H), 2.68 (s, 3H).  $^{13}\text{C}$  NMR (126 MHz, CDCl<sub>3</sub>):  $\delta$ =159.53, 147.95, 144.14, 134.98, 127.23, 121.44, 120.48, 119.23, 109.94, 25.30.

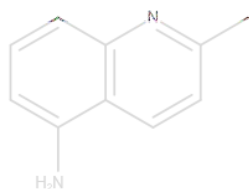

5-aminoquinoline,  $^1\text{H}$  NMR (600 MHz, Chloroform-d):  $\delta$ =7.88 (d, J = 8.1 Hz, 1H), 7.58 (d, J = 8.6 Hz, 1H), 7.17 (d, J = 2.2 Hz, 1H), 7.05 (d, J = 8.2 Hz, 1H), 6.93 (dd, J = 8.6, 2.3 Hz, 1H), 4.05 (s, 2H), 2.69 (s, 3H).  $^{13}\text{C}$  NMR (126 MHz, CDCl<sub>3</sub>):  $\delta$ =159.18, 149.54, 147.68, 135.88, 128.62, 120.44, 118.57, 117.56, 108.93, 25.27.

1. L. He, J. Q. Wang, Y. Gong, Y. M. Liu, Y. Cao, H. Y. He and K. N. Fan, *Angew Chem Int Ed Engl*, 2011, **50**, 10216-10220.
2. Y. Matsubara, S. Hirakawa, Y. Yamaguchi and Z. Yoshida, *Angew Chem Int Ed Engl*, 2011, **50**, 7670-7673.
3. Z. Zhang, J. Tan and Z. Wang, *Organic Letters*, 2008, **10**, 173-175.

## 4. $^1\text{H}$ and $^{13}\text{C}$ NMR Spectra

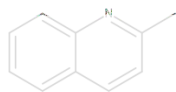

( $^1\text{H}$  NMR)

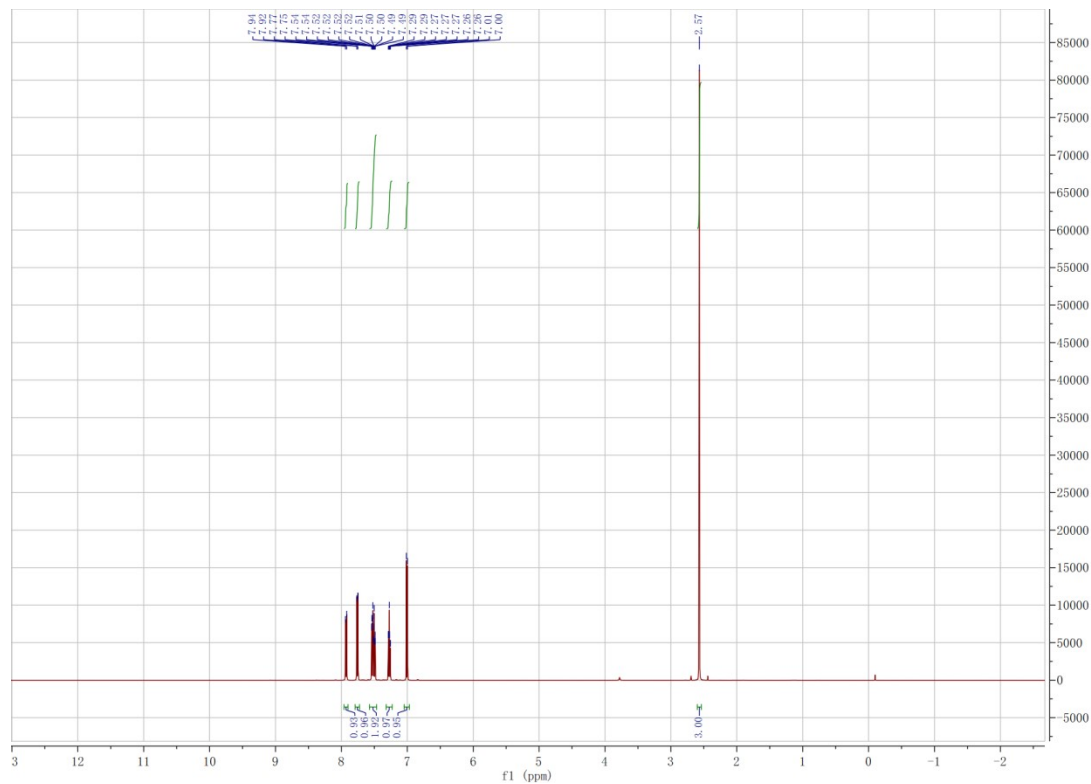

( $^{13}\text{C}$  NMR)

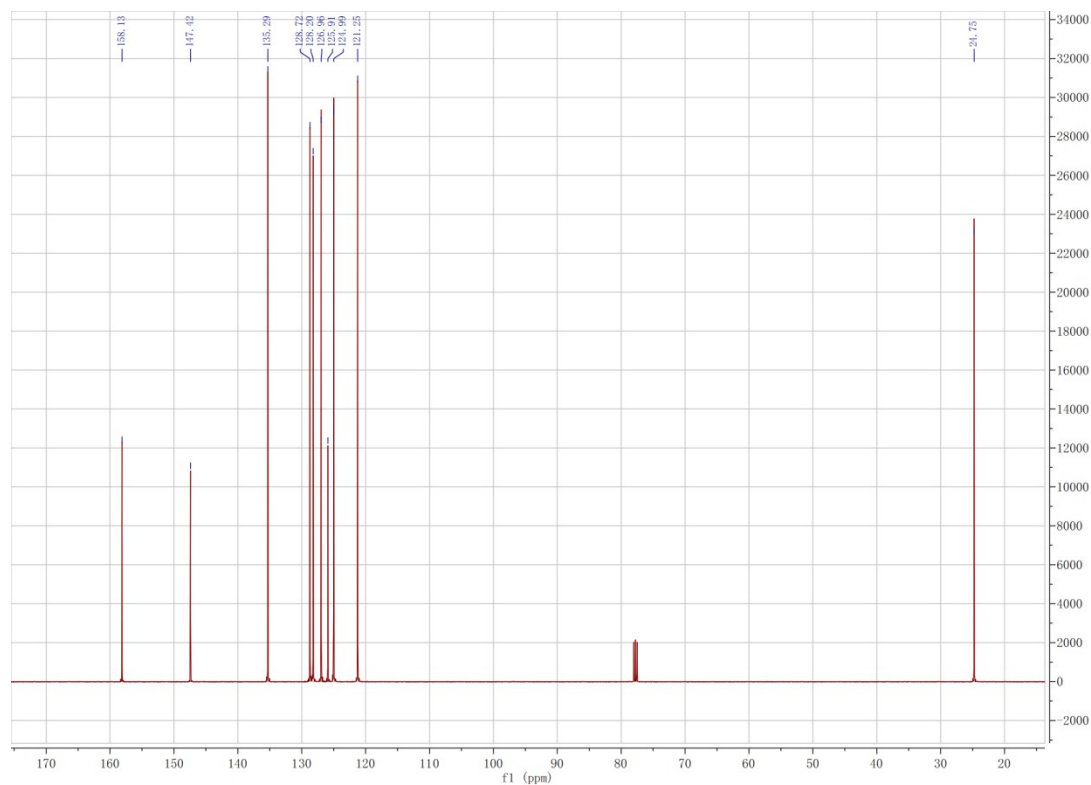

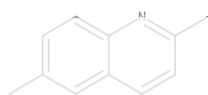

<sup>1</sup>H NMR

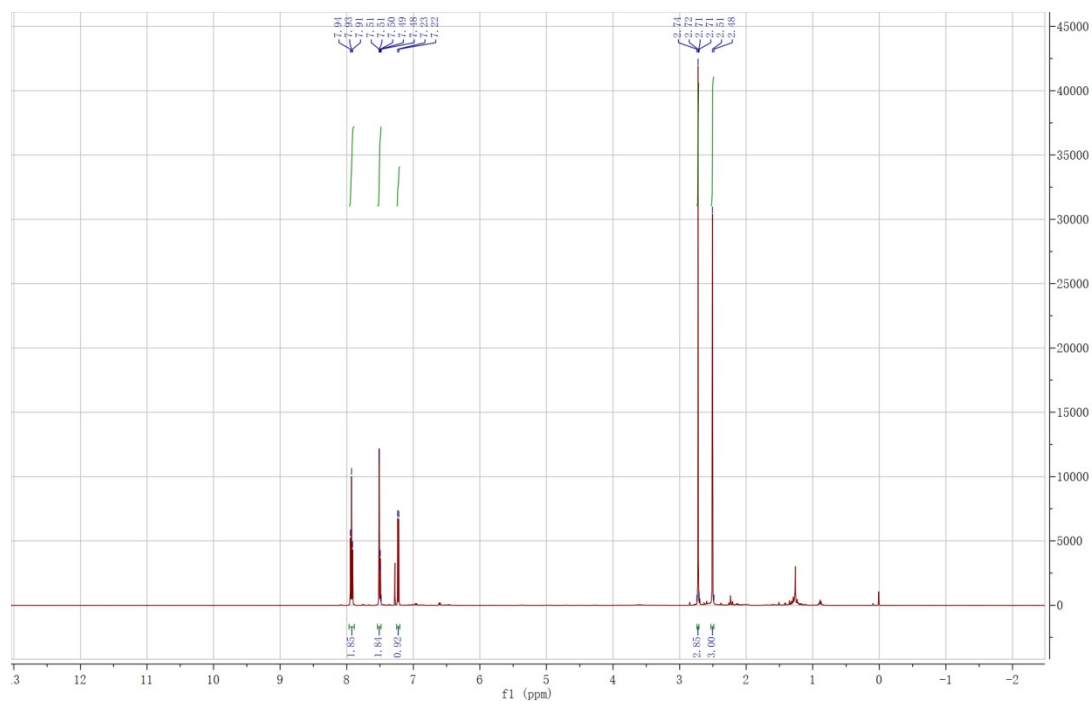

<sup>13</sup>C NMR

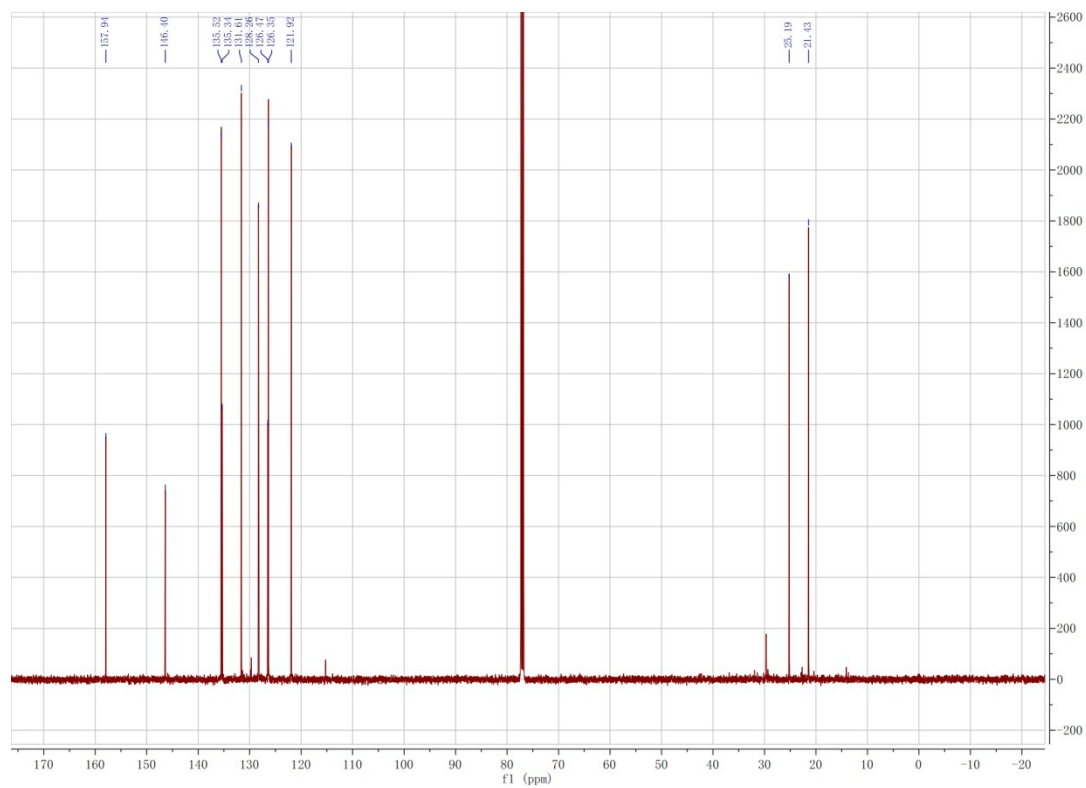



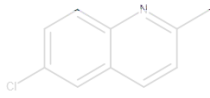

(<sup>1</sup>H NMR)

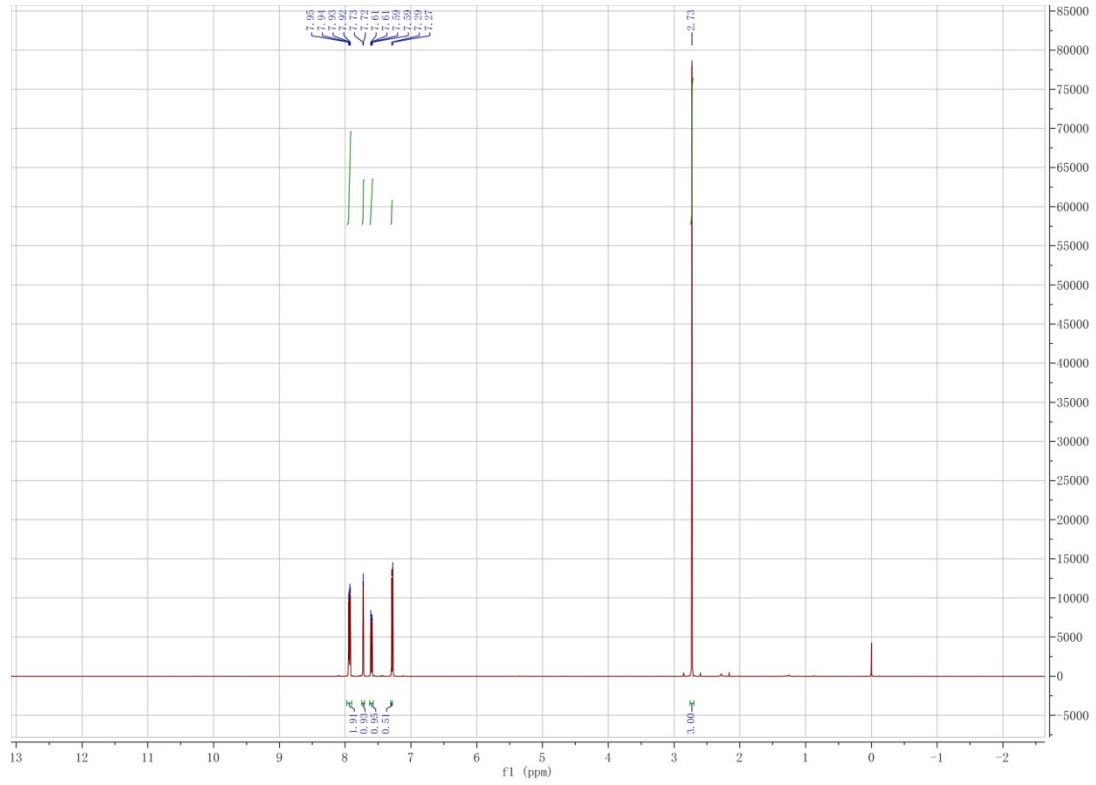

(<sup>13</sup>C NMR)

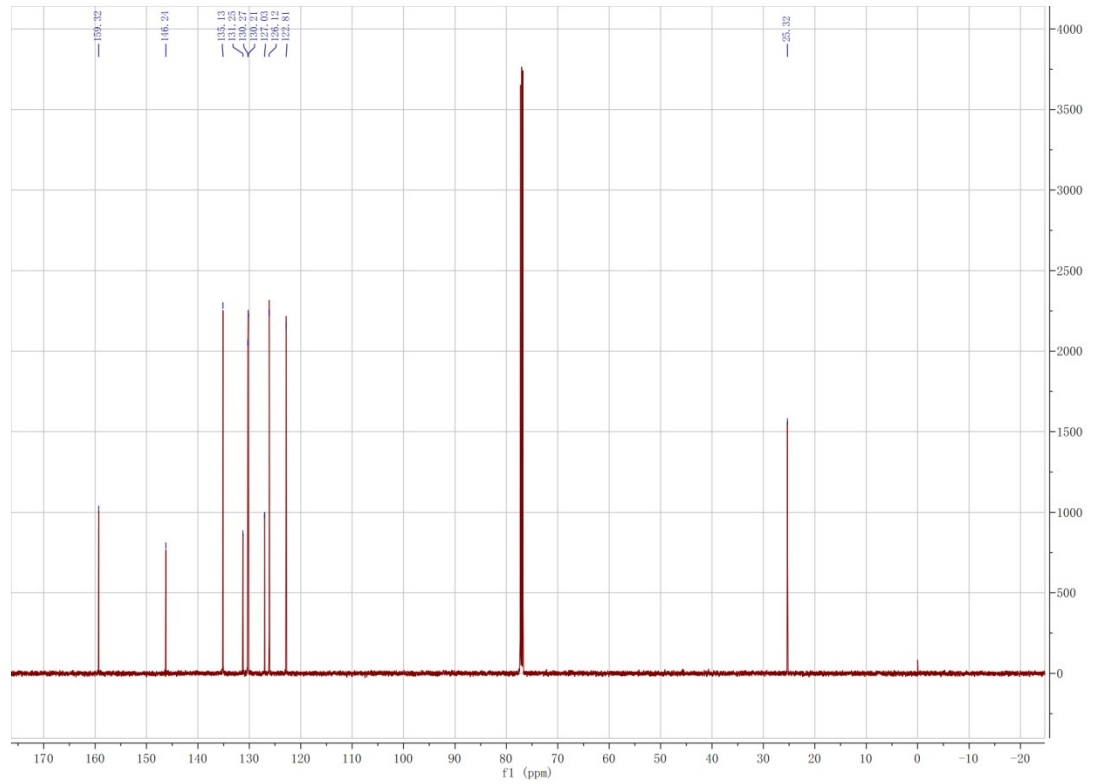

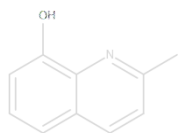

(<sup>1</sup>H NMR)

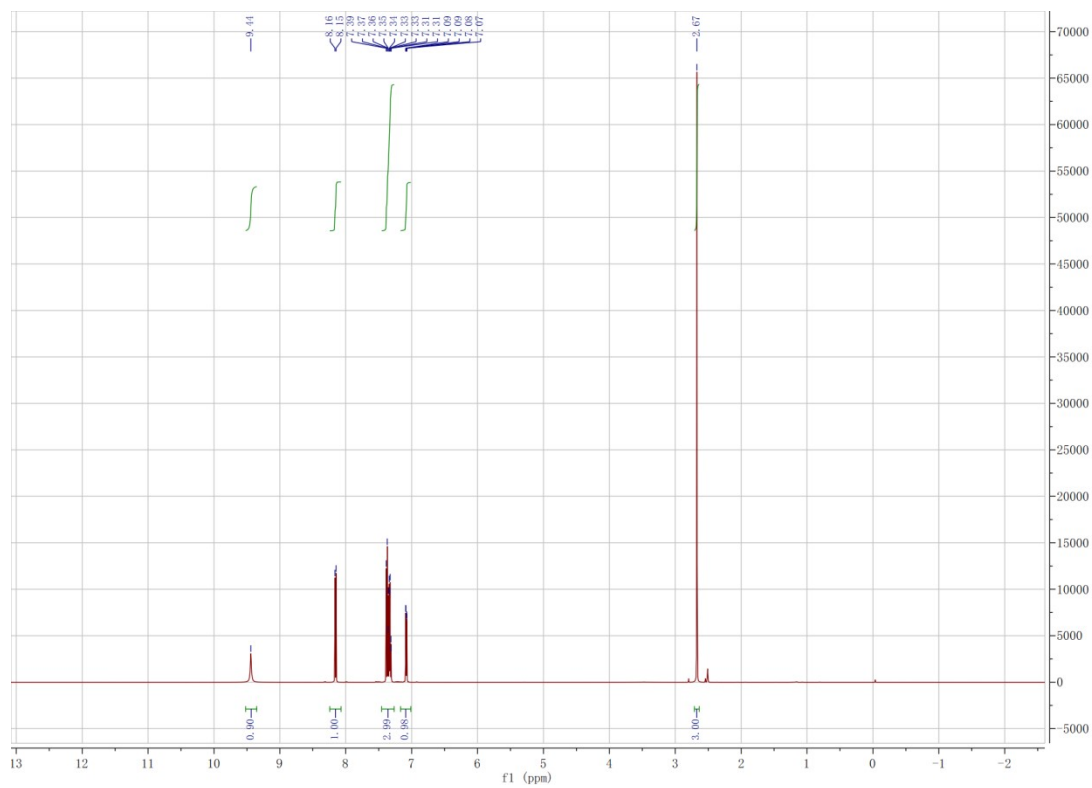

(<sup>13</sup>C NMR)

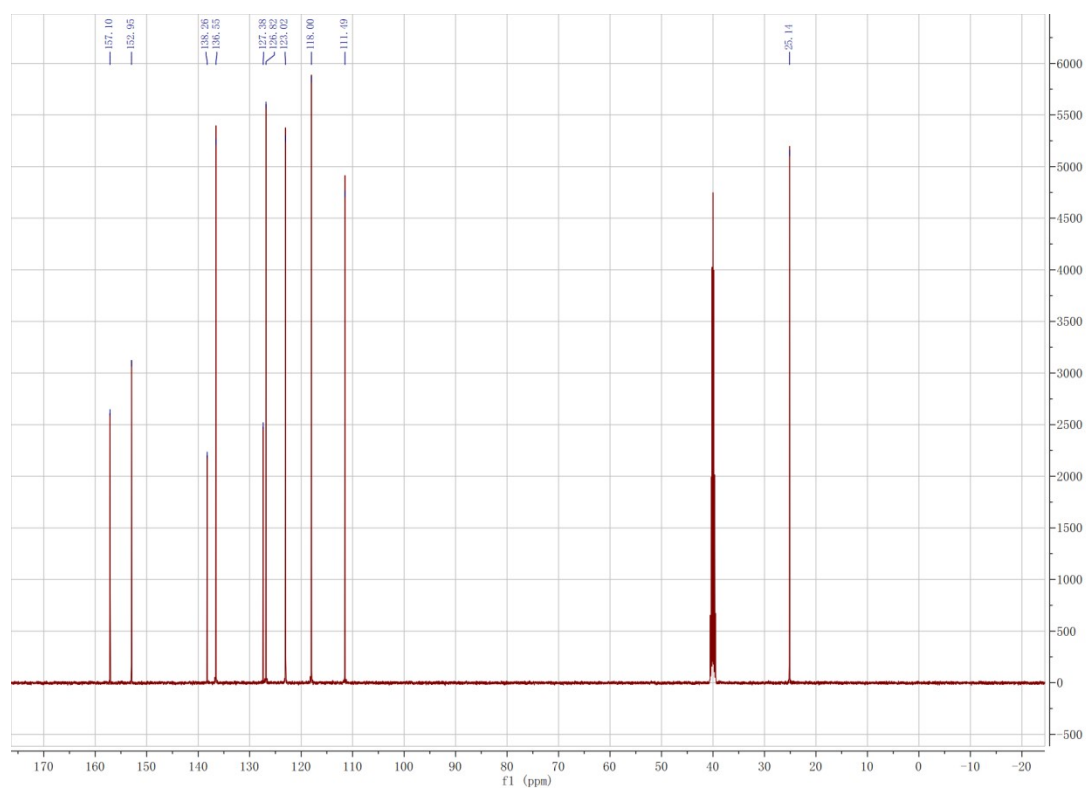

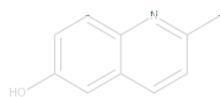

(<sup>1</sup>H NMR)

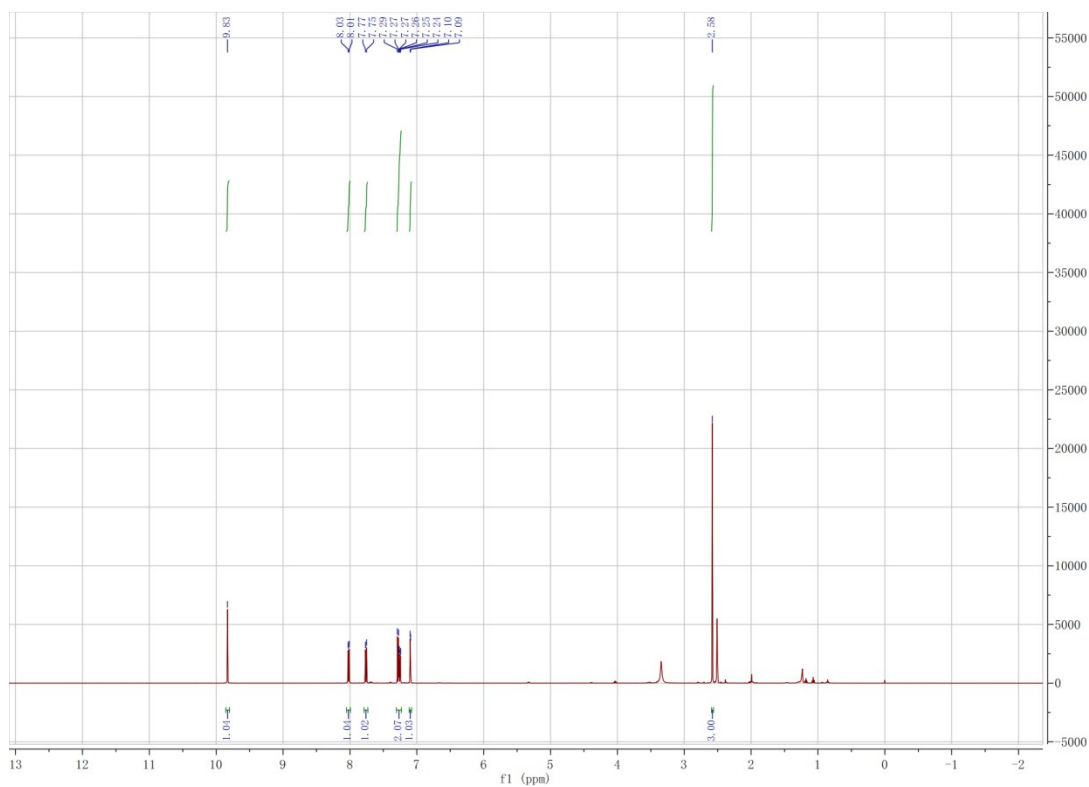

(<sup>13</sup>C NMR)

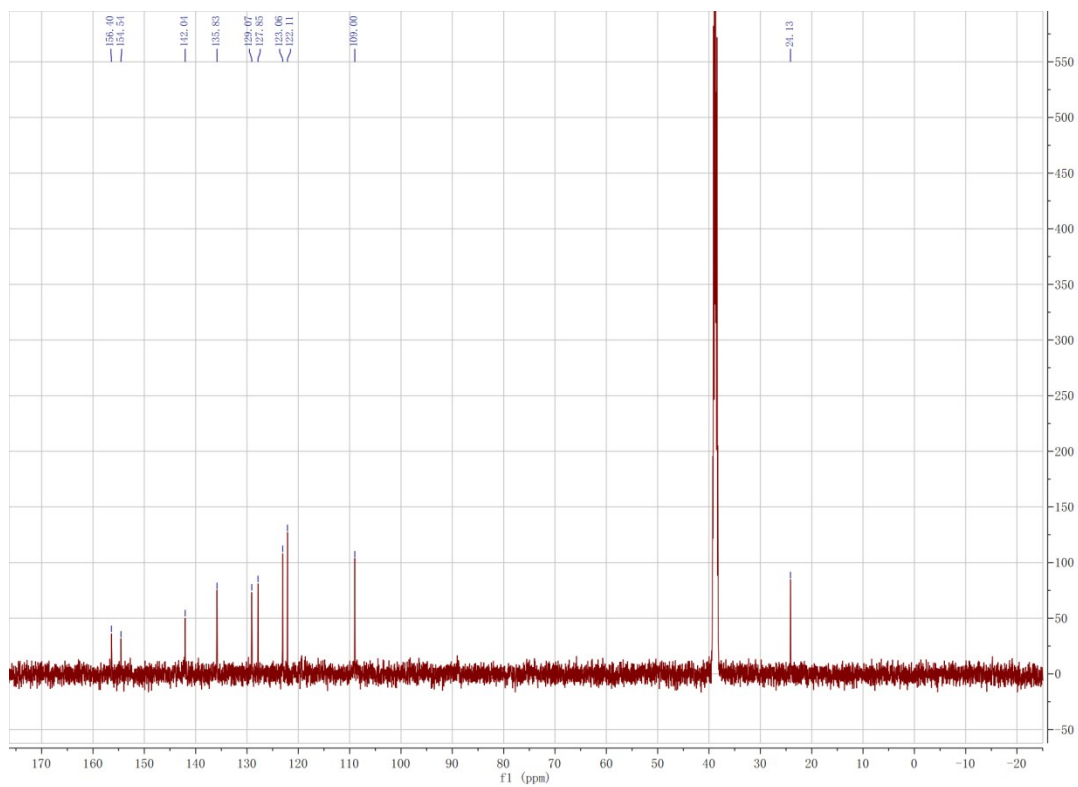

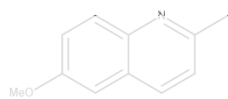

(<sup>1</sup>H NMR)

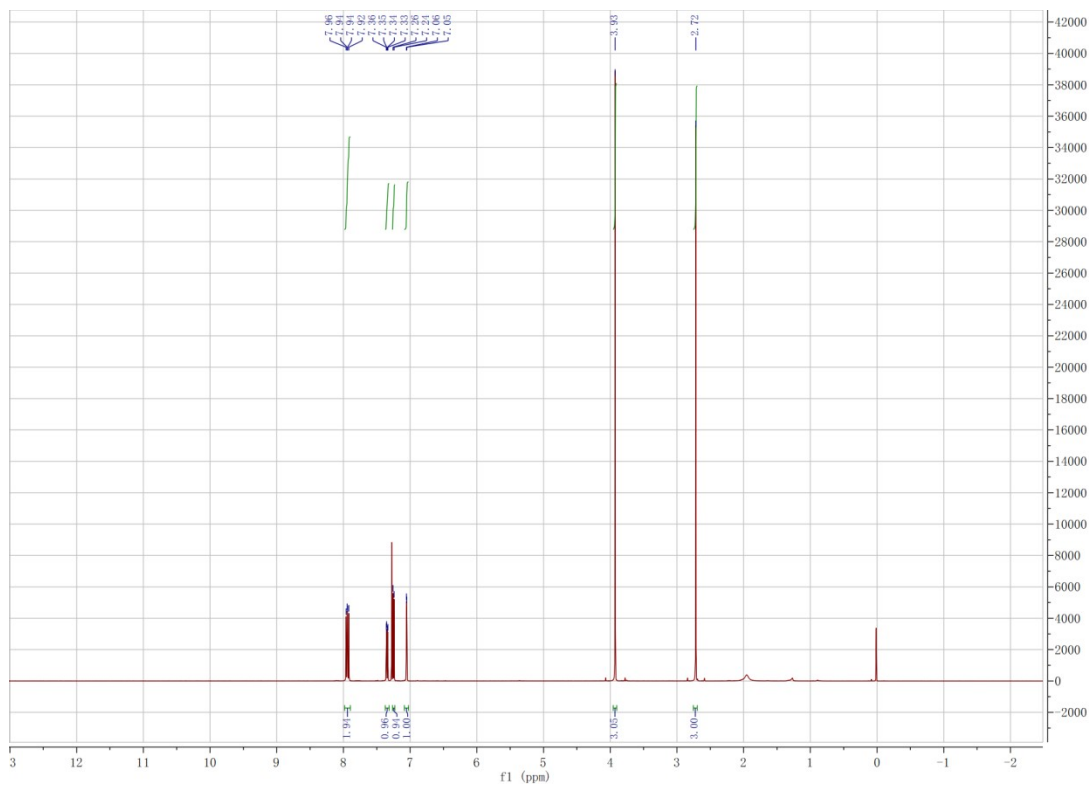

(<sup>13</sup>C NMR)

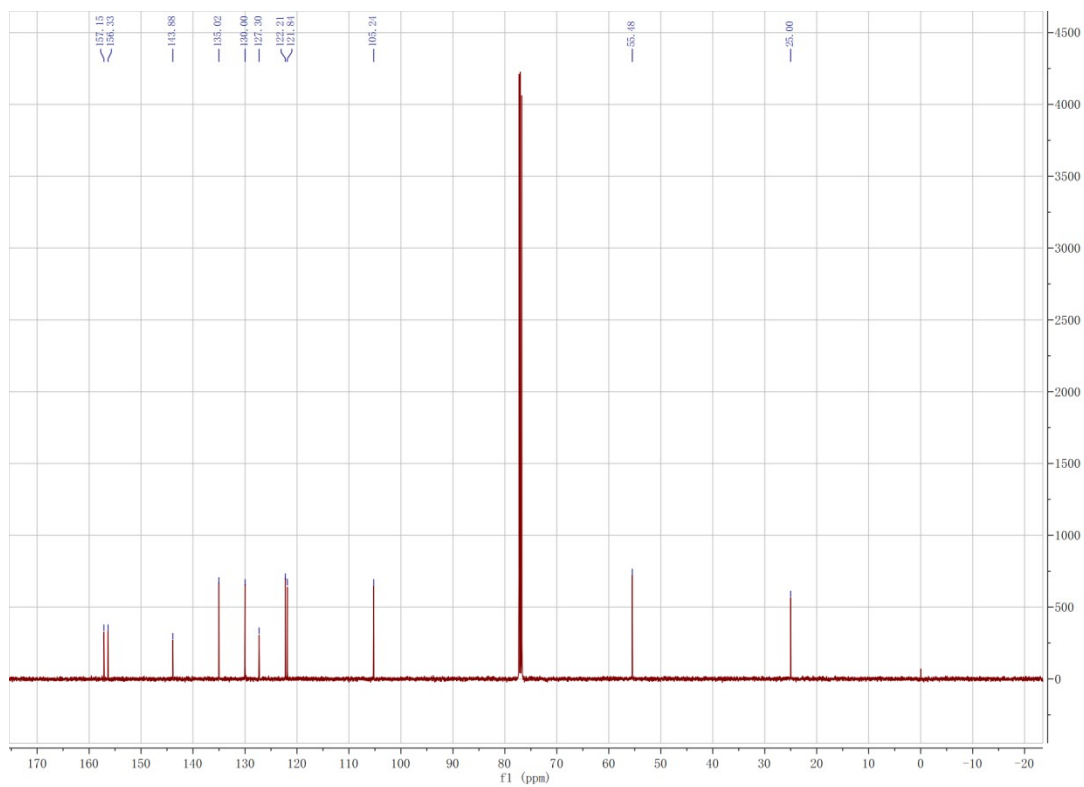

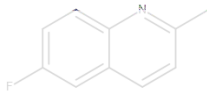

(<sup>1</sup>H NMR)

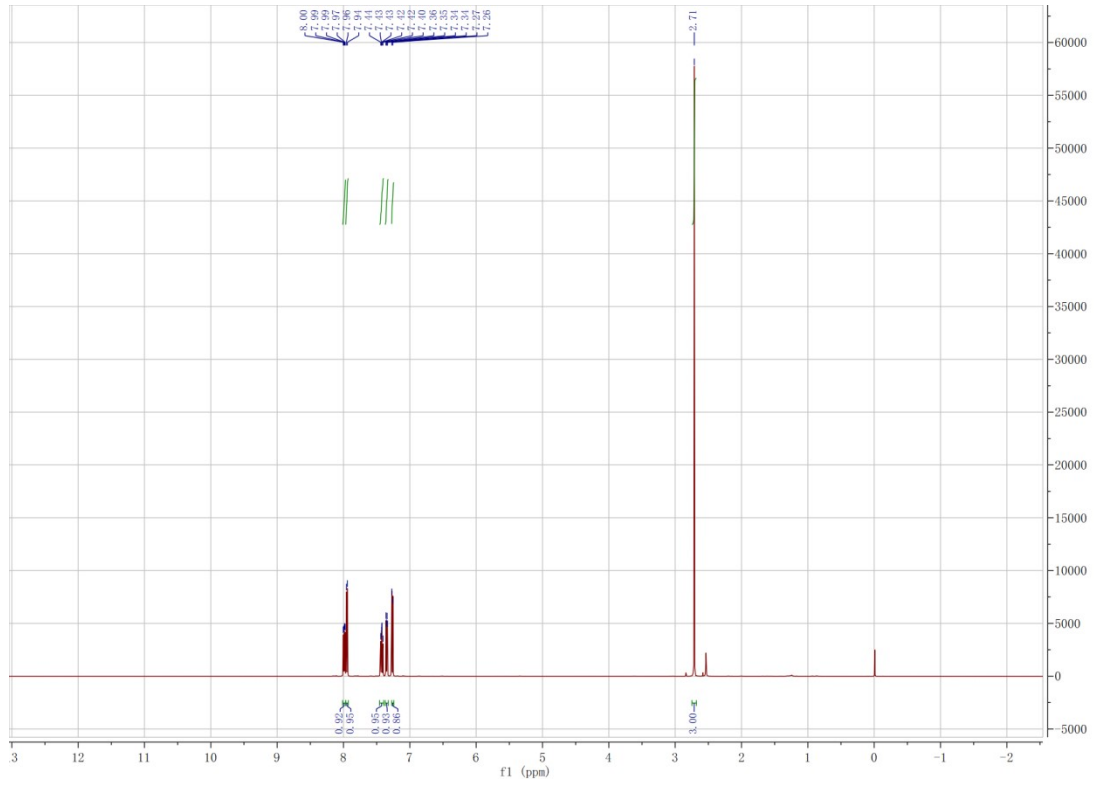

(<sup>13</sup>C NMR)

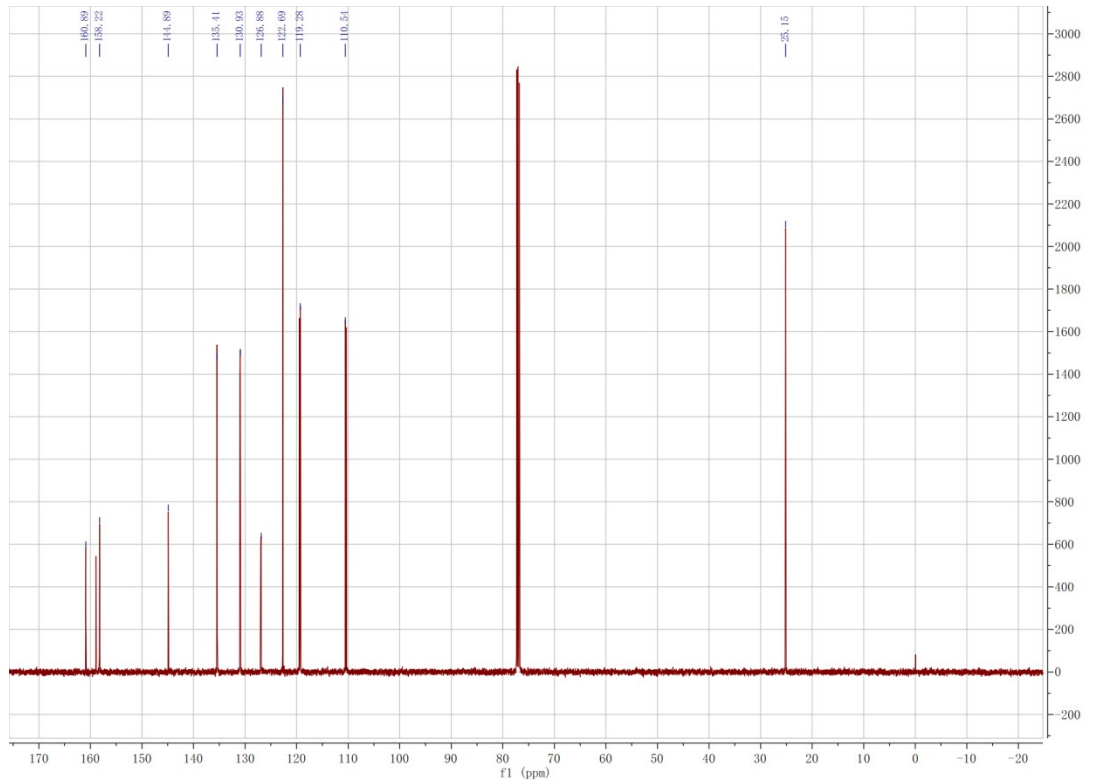

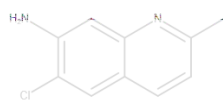

(<sup>1</sup>H NMR)

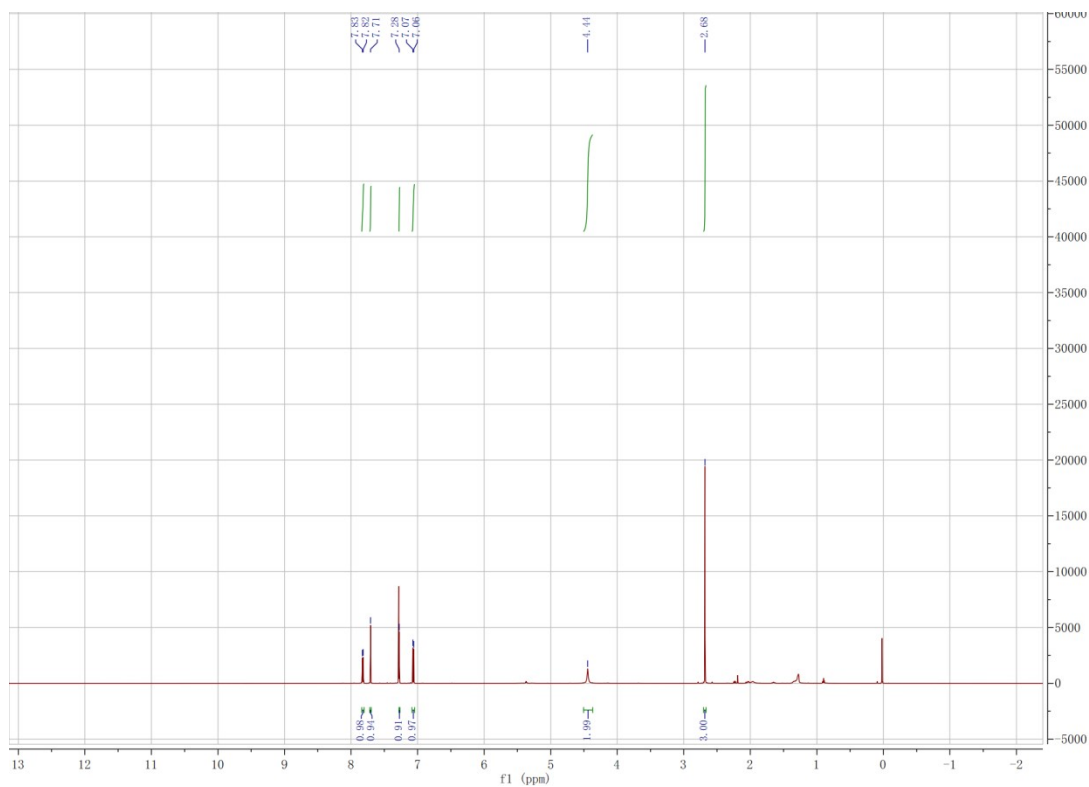

(<sup>13</sup>C NMR)

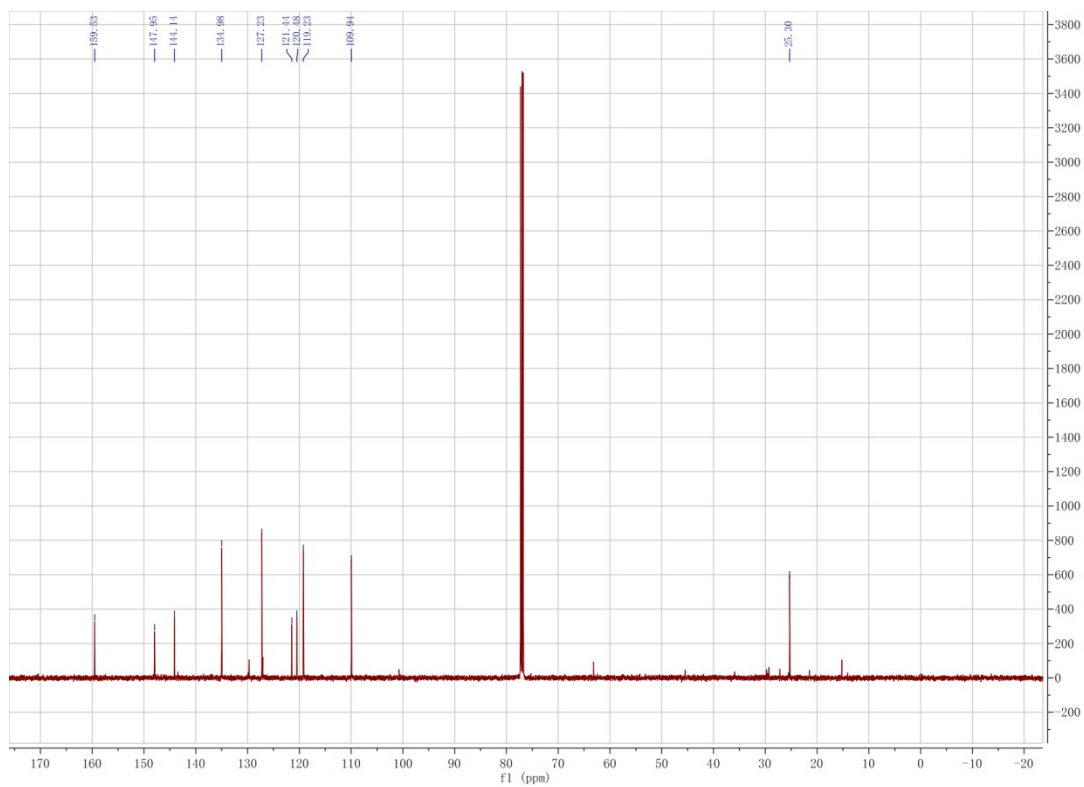

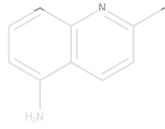

<sup>1</sup>H NMR

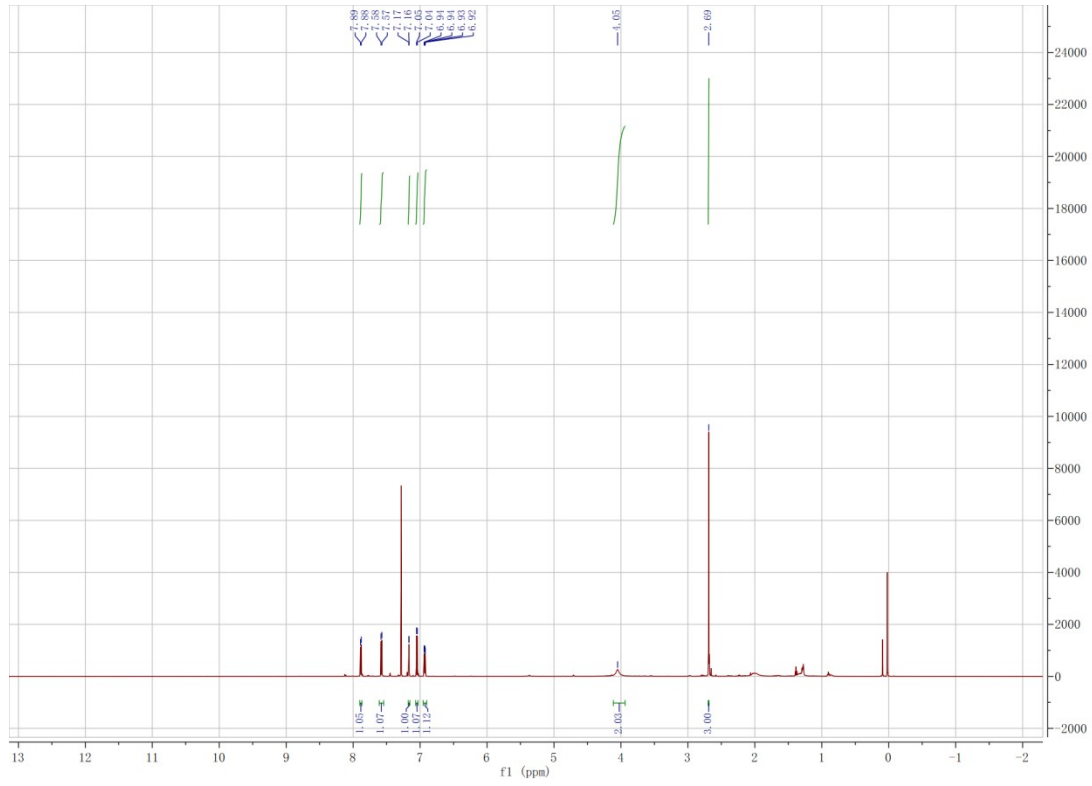

<sup>13</sup>C NMR

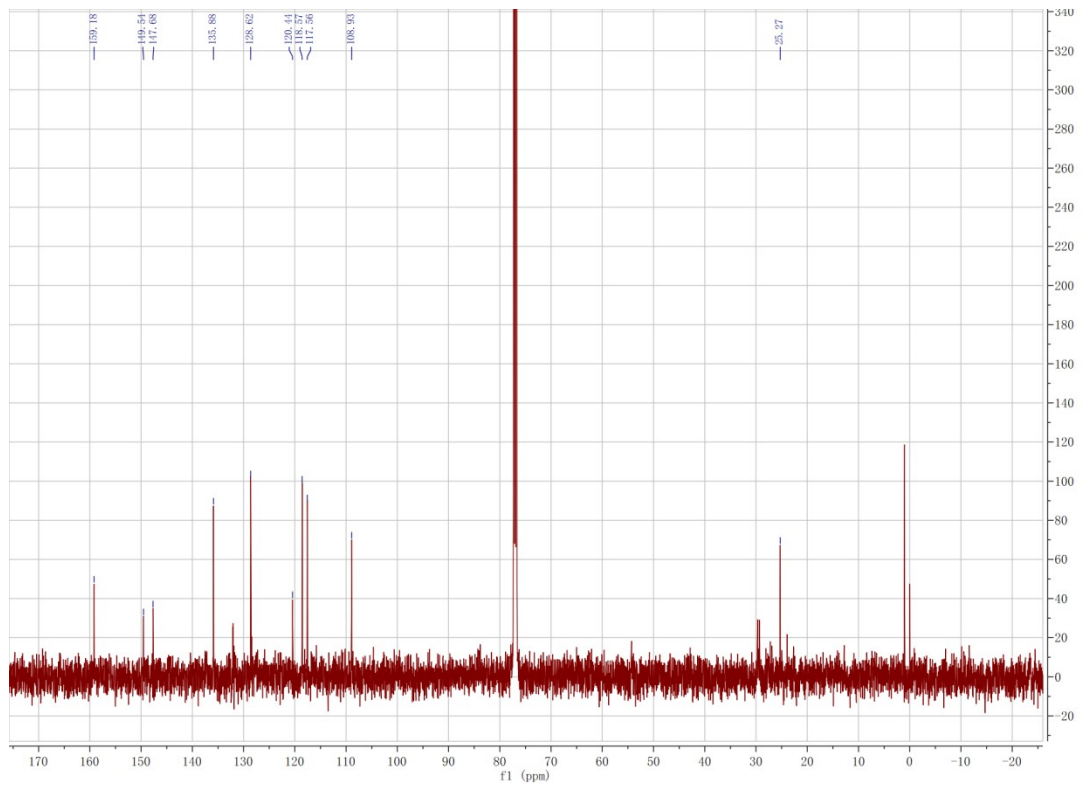

## 5. Mass spectrum

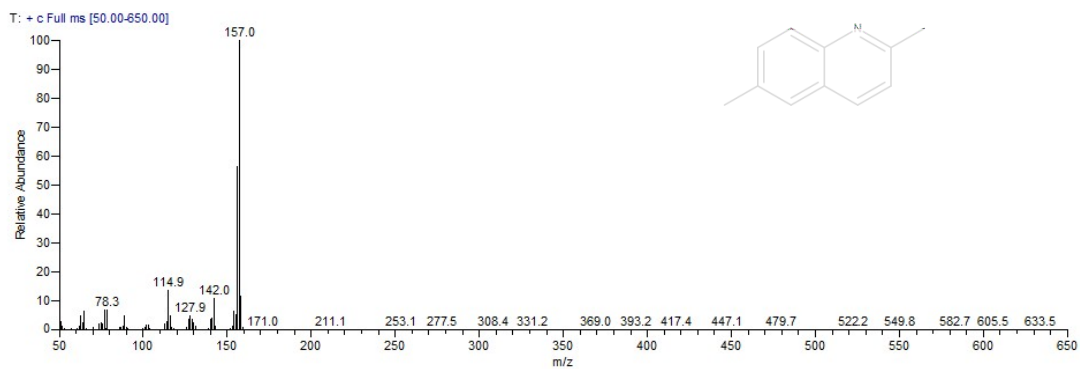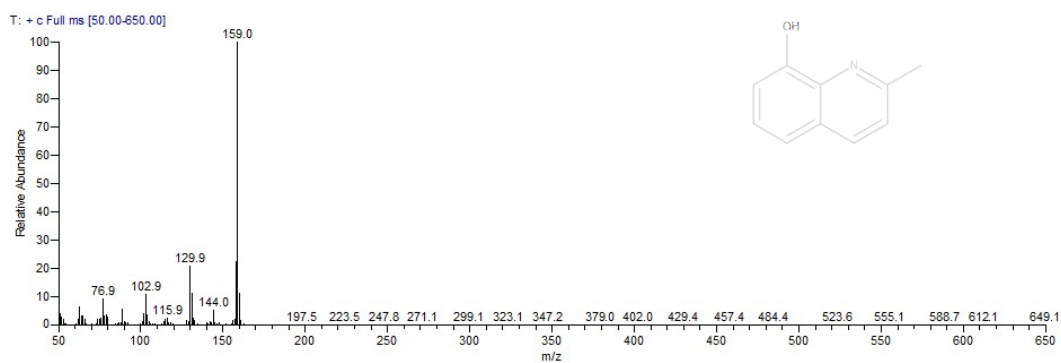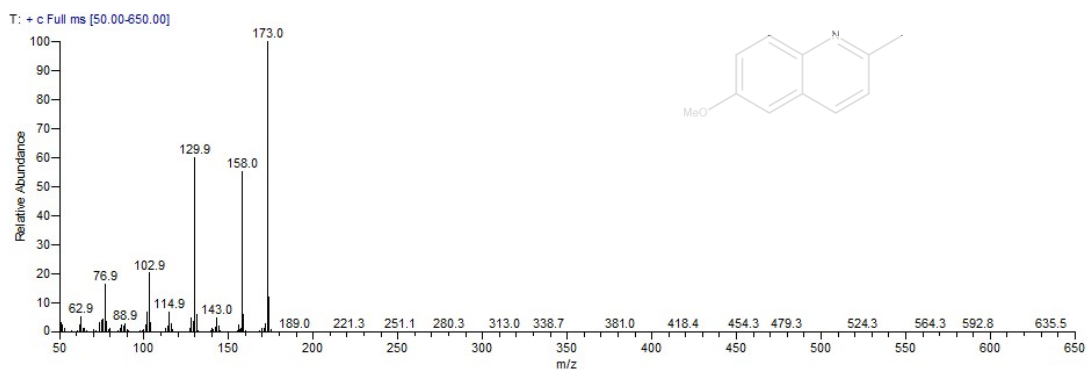



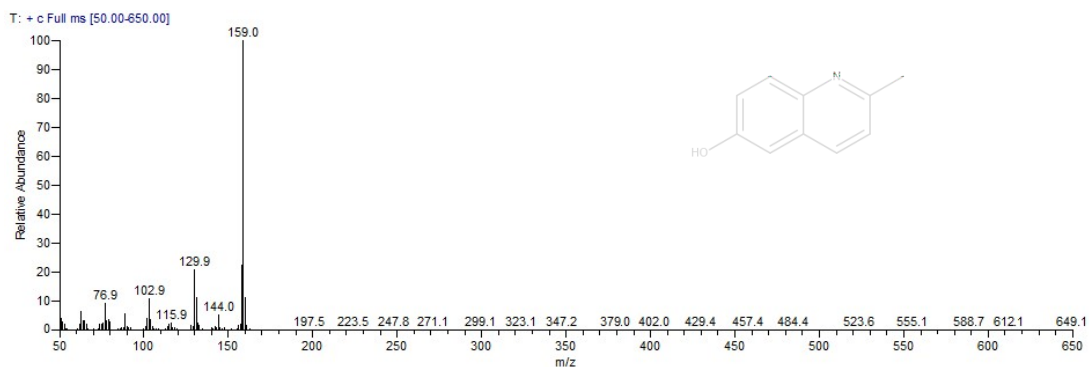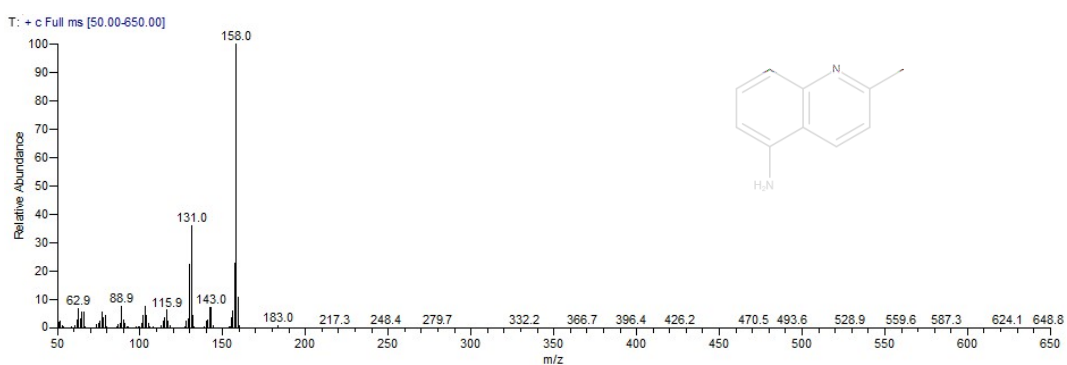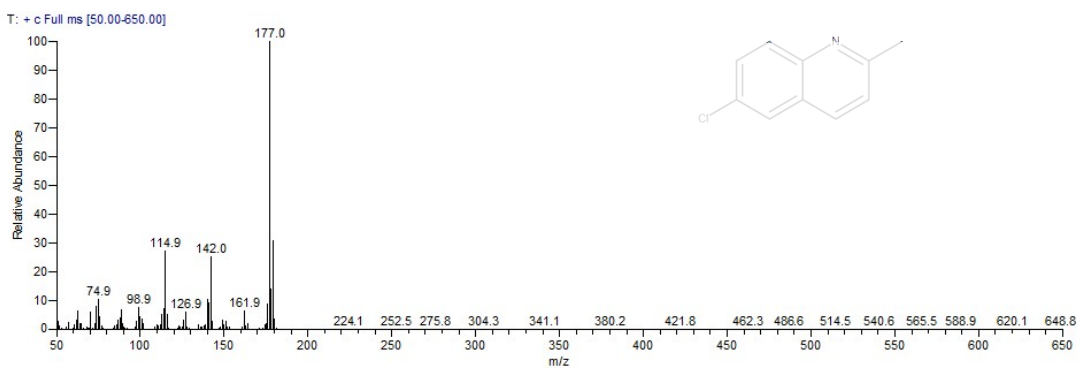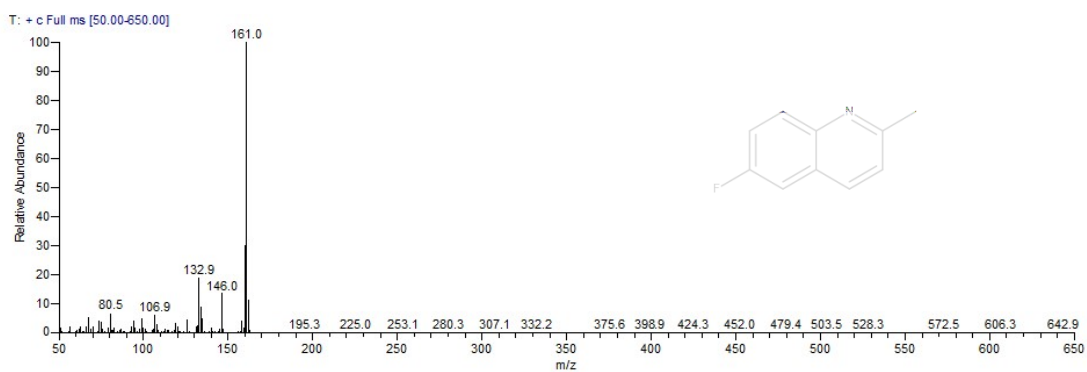

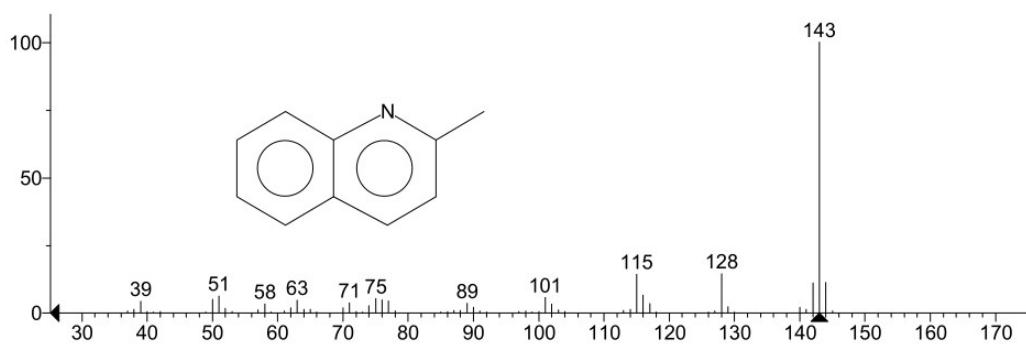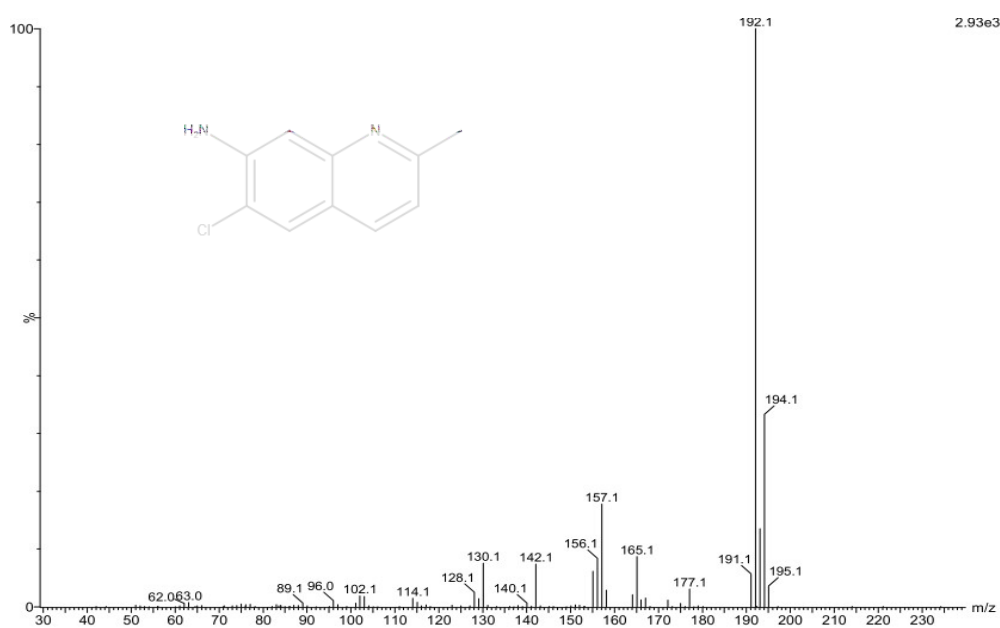

**Fig. S3** The Mass spectrum of 2-methylquinoline compounds
